# Supplementary material
Source: publisher figshare collection journal article supplement (https://brill.figshare.com/articles/dataset/_/24204501)
Supplement: Supplementary file 1 [file 1]

## Sheet: ESM 4
	Appendix B Vignaud et al. (2023). Assessing personalities in wild adult Bull shark Carcharhinus leucas
	Each shark is attributed 5 points for each situation. The 5 points are divided among the behaviours, based on overall behavior and plasticity over all the observations.
					Trying to get food	Trying to get food	Trying to get food	Trying to get food	No Food
					Far from divers	Close to divers	Far from divers	Close to divers	Behaviour towards diver(s)	Temperament Score (food only)	Plasticity Score (food only)
Size	Seks	Shark	Rating	Weight	Alone	Alone	within group	within group		Weighted sum divided by 4	sum of departure from 5 divided by 4
Large	Male	Cl02	Timid	-3	0	0	0	0	0	13.5	5
			Apprehensive	-2	0	0	0	0	3
			Confident	2	1	2	1	2	2		5
			Bold	3	4	3	4	3	0
			Combative	5	0	0	0	0	0
small	Male	Cl04	Timid	-3	1	2	2	3	4	-9	7.5
			Apprehensive	-2	2	3	2	2	1
			Confident	2	2	0	1	0	0		7.5
			Bold	3	0	0	0	0	0
			Combative	5	0	0	0	0	0
Vlarge	Female	Cl07	Timid	-3	0	0	0	0	0	9.75	8.75
			Apprehensive	-2	0	1	0	2	4
			Confident	2	4	1	1	2	1		8.75
			Bold	3	1	3	3	1	0
			Combative	5	0	0	1	0	0
small	Female	Cl12	Timid	-3	0	1	0	2	4	-2.75	7.5
			Apprehensive	-2	2	3	2	2	1
			Confident	2	3	1	3	1	0		7.5
			Bold	3	0	0	0	0	0
			Combative	5	0	0	0	0	0
Large	Female	Cl13	Timid	-3	0	0	0	0	0	16.5	5
			Apprehensive	-2	0	0	0	0	0
			Confident	2	1	1	0	0	3		5
			Bold	3	4	4	3	3	2
			Combative	5	0	0	2	2	0
small	Female	Cl16	Timid	-3	3	4	3	4	5	-13.5	5
			Apprehensive	-2	2	1	2	1	0
			Confident	2	0	0	0	0	0		5
			Bold	3	0	0	0	0	0
			Combative	5	0	0	0	0	0
Med	Male	Cl21	Timid	-3	0	0	0	1	0	-3.25	6.25
			Apprehensive	-2	2	3	4	3	1
			Confident	2	3	2	1	1	3		6.25
			Bold	3	0	0	0	0	1
			Combative	5	0	0	0	0	0
Vlarge	Female	Cl22	Timid	-3	0	0	0	0	1	6	10
			Apprehensive	-2	1	2	1	2	1
			Confident	2	2	1	2	1	2		10
			Bold	3	2	2	2	2	1
			Combative	5	0	0	0	0	0
Vlarge	Female	Cl24	Timid	-3	0	0	0	0	1	9.25	7.5
			Apprehensive	-2	0	1	1	0	1
			Confident	2	4	3	3	3	2		7.5
			Bold	3	1	1	1	2	0
			Combative	5	0	0	0	0	0
Large	Female	Cl27	Timid	-3	0	0	0	0	0	18	5
			Apprehensive	-2	0	0	0	0	1
			Confident	2	0	0	0	0	3		5
			Bold	3	3	4	3	4	1
			Combative	5	2	1	2	1	0
Small	Female	Cl28	Timid	-3	0	1	2	3	2	-7.5	6.25
			Apprehensive	-2	2	4	2	2	3
			Confident	2	3	0	1	0	0		6.25
			Bold	3	0	0	0	0	0
			Combative	5	0	0	0	0	0
Vlarge	Female	Cl30	Timid	-3	0	0	0	0	1	10	7.5
			Apprehensive	-2	0	1	0	1	2
			Confident	2	2	3	3	2	2		7.5
			Bold	3	3	1	2	2	0
			Combative	5	0	0	0	0	0
Large	Female	Cl31	Timid	-3	0	0	0	0	1	14.5	10
			Apprehensive	-2	0	0	0	0	3
			Confident	2	2	3	3	2	1		10
			Bold	3	2	1	1	2	0
			Combative	5	1	1	1	1	0
Large	Female	Cl32	Timid	-3	0	0	0	0	0	12.75	5
			Apprehensive	-2	0	0	0	0	2
			Confident	2	3	3	2	1	3		5
			Bold	3	2	2	3	4	0
			Combative	5	0	0	0	0	0
Vlarge	Female	Cl33	Timid	-3	0	0	0	0	0	11	6.25
			Apprehensive	-2	0	1	0	0	2
			Confident	2	3	3	3	2	3		6.25
			Bold	3	2	1	2	3	0
			Combative	5	0	0	0	0	0
Med	female	Cl36	Timid	-3	0	3	1	4	3	-7	6.25
			Apprehensive	-2	1	2	3	1	2
			Confident	2	4	0	1	0	0		6.25
			Bold	3	0	0	0	0	0
			Combative	5	0	0	0	0	0
Med	Female	Cl37	Timid	-3	0	1	0	0	0	2.5	10
			Apprehensive	-2	1	2	2	2	4
			Confident	2	3	1	3	2	1		10
			Bold	3	1	1	0	1	0
			Combative	5	0	0	0	0	0
Large	Female	Cl40	Timid	-3	0	0	0	0	0	13.75	11.25
			Apprehensive	-2	0	0	1	0	2
			Confident	2	2	2	2	2	2		11.25
			Bold	3	2	2	1	2	1
			Combative	5	1	1	1	1	0
Large	Female	Cl41	Timid	-3	0	0	0	0	0	8.75	10
			Apprehensive	-2	0	1	1	1	2
			Confident	2	4	3	3	2	3		10
			Bold	3	1	1	1	1	0
			Combative	5	0	0	0	1	0
Vlarge	Female	Cl42	Timid	-3	0	0	0	0	0	14	6.25
			Apprehensive	-2	0	0	0	0	1
			Confident	2	2	2	1	1	2		6.25
			Bold	3	2	3	4	4	2
			Combative	5	1	0	0	0	0
Med	Female	Cl43	Timid	-3	0	1	0	0	2	3.5	10
			Apprehensive	-2	1	2	1	2	3
			Confident	2	3	2	3	2	0		10
			Bold	3	1	0	1	1	0
			Combative	5	0	0	0	0	0
Med	Female	Cl44	Timid	-3	0	2	2	3	3	-8.75	5
			Apprehensive	-2	2	3	3	2	2
			Confident	2	3	0	0	0	0		5
			Bold	3	0	0	0	0	0
			Combative	5	0	0	0	0	0
Large	Female	Cl45	Timid	-3	0	0	0	0	0	12.25	5
			Apprehensive	-2	0	0	0	0	3
			Confident	2	3	3	2	3	2		5
			Bold	3	2	2	3	2	0
			Combative	5	0	0	0	0	0
Vlarge	Female	Cl46	Timid	-3	0	0	0	0	0	22	5
			Apprehensive	-2	0	0	0	0	0
			Confident	2	0	0	0	0	2		5
			Bold	3	1	3	1	1	3
			Combative	5	4	2	4	4	0
Large	Female	Cl49	Timid	-3	0	0	0	0	0	5.5	6.25
			Apprehensive	-2	0	2	1	2	2
			Confident	2	4	3	4	2	3		6.25
			Bold	3	1	0	0	1	0
			Combative	5	0	0	0	0	0
Vlarge	Female	Cl50	Timid	-3	0	0	0	0	0	14.5	2.5
			Apprehensive	-2	0	0	0	0	0
			Confident	2	0	0	1	1	4		2.5
			Bold	3	5	5	4	4	1
			Combative	5	0	0	0	0	0
Small	Male	Cl52	Timid	-3	0	1	1	1	1	-3.75	7.5
			Apprehensive	-2	2	2	2	4	4
			Confident	2	3	2	2	0	0		7.5
			Bold	3	0	0	0	0	0
			Combative	5	0	0	0	0	0
Vlarge	Female	Cl58	Timid	-3	0	0	0	0	0	11.25	5
			Apprehensive	-2	0	0	0	0	0
			Confident	2	4	4	4	3	5		5
			Bold	3	1	1	1	2	0
			Combative	5	0	0	0	0	0
Large	Female	Cl59	Timid	-3	0	0	0	0	0	10.75	6.25
			Apprehensive	-2	0	0	0	1	0
			Confident	2	3	3	3	3	4		6.25
			Bold	3	2	2	2	1	1
			Combative	5	0	0	0	0	0
Large	Female	Cl69	Timid	-3	0	0	0	0	0	8.75	8.75
			Apprehensive	-2	0	1	1	1	2
			Confident	2	3	3	2	2	3		8.75
			Bold	3	2	1	2	2	0
			Combative	5	0	0	0	0	0
Large	Female	Cl70	Timid	-3	0	0	0	0	0	8	8.75
			Apprehensive	-2	1	0	1	1	0
			Confident	2	3	4	3	3	3		8.75
			Bold	3	1	1	1	1	2
			Combative	5	0	0	0	0	0
